# Supplementary material for: Non-Saccharomyces Yeasts from Organic Vineyards as Spontaneous Fermentation Agents
Source: MDPI journal article supplement (doi:10.3390/foods12193644), 2023-10-02
Supplement: s1 [file s1]

**Table S2.** Measurement of  $\beta$ -lyase activity.

| <i>Torulaspora delbruckii</i>  |                                | <i>Pichia guilliermondii</i>    |                                |
|--------------------------------|--------------------------------|---------------------------------|--------------------------------|
| <b>Td01</b>                    | 9.84 $\pm$ 0.03 <sup>a</sup>   | <b>Pg01</b>                     | 9.61 $\pm$ 0.02 <sup>a</sup>   |
| <b>Td02</b>                    | 9.86 $\pm$ 0.06 <sup>a</sup>   | <b>Pg02</b>                     | 9.55 $\pm$ 0.03 <sup>b</sup>   |
| <b>Td03</b>                    | 9.89 $\pm$ 0.01 <sup>a</sup>   |                                 |                                |
| <i>Hanseniaspora osmophila</i> |                                | <i>Hanseniaspora meyeri</i>     |                                |
| <b>Ho01</b>                    | 9.79 $\pm$ 0.09                | <b>Hm01</b>                     | 9.80 $\pm$ 0.04                |
| <i>Pichia kudriavzevii</i>     |                                | <i>Wickerhamomyces anomalus</i> |                                |
| <b>Pk01</b>                    | 9.39 $\pm$ 0.07 <sup>a</sup>   | <b>Wa01</b>                     | 9.20 $\pm$ 0.02 <sup>a</sup>   |
| <b>Pk02</b>                    | 9.57 $\pm$ 0.01 <sup>bc</sup>  | <b>Wa02</b>                     | 9.33 $\pm$ 0.04 <sup>ab</sup>  |
| <b>Pk03</b>                    | 9.46 $\pm$ 0.03 <sup>ab</sup>  | <b>Wa03</b>                     | 9.34 $\pm$ 0.06 <sup>bc</sup>  |
| <b>Pk04</b>                    | 9.71 $\pm$ 0.03 <sup>cd</sup>  | <b>Wa04</b>                     | 9.46 $\pm$ 0.03 <sup>cde</sup> |
| <b>Pk05</b>                    | 9.72 $\pm$ 0.03 <sup>d</sup>   | <b>Wa05</b>                     | 9.46 $\pm$ 0.02 <sup>de</sup>  |
| <b>Pk06</b>                    | 9.67 $\pm$ 0.11 <sup>cd</sup>  | <b>Wa06</b>                     | 9.55 $\pm$ 0.01 <sup>ef</sup>  |
| <b>Pk07</b>                    | 9.73 $\pm$ 0.06 <sup>d</sup>   | <b>Wa07</b>                     | 9.49 $\pm$ 0.07 <sup>de</sup>  |
| <b>Pk08</b>                    | 9.64 $\pm$ 0.05 <sup>cd</sup>  | <b>Wa08</b>                     | 9.39 $\pm$ 0.03 <sup>bcd</sup> |
| <b>Pk09</b>                    | 9.71 $\pm$ 0.00 <sup>cd</sup>  | <b>Wa09</b>                     | 9.50 $\pm$ 0.04 <sup>de</sup>  |
| <b>Pk10</b>                    | 9.61 $\pm$ 0.02 <sup>bcd</sup> | <b>Wa10</b>                     | 9.57 $\pm$ 0.00 <sup>ef</sup>  |
| <b>Pk11</b>                    | 9.67 $\pm$ 0.05 <sup>cd</sup>  | <b>Wa11</b>                     | 9.54 $\pm$ 0.01 <sup>ef</sup>  |
| <b>Pk12</b>                    | 9.66 $\pm$ 0.00 <sup>cd</sup>  | <b>Wa12</b>                     | 9.76 $\pm$ 0.01 <sup>g</sup>   |
| <b>Pk13</b>                    | 9.61 $\pm$ 0.01 <sup>cd</sup>  | <b>Wa13</b>                     | 9.53 $\pm$ 0.04 <sup>ef</sup>  |
|                                |                                | <b>Wa14</b>                     | 9.64 $\pm$ 0.07 <sup>fg</sup>  |
|                                |                                | <b>Wa15</b>                     | 9.51 $\pm$ 0.07 <sup>def</sup> |
|                                |                                | <b>Wa16</b>                     | 9.48 $\pm$ 0.04 <sup>de</sup>  |

Quantification of  $\beta$ -lyase activity expressed as yeast growth after 48h ( $\text{Log}_{10}\text{CFU/mL}$ ). Different letters in the same yeast species indicate significant differences among  $\beta$ -lyase activity of the isolates analysed ( $p < 0.05$ ).
