# Supplementary material for: Non-Saccharomyces Yeasts from Organic Vineyards as Spontaneous Fermentation Agents
Source: MDPI journal article supplement (doi:10.3390/foods12193644), 2023-10-02
Supplement: s1 [file s1]

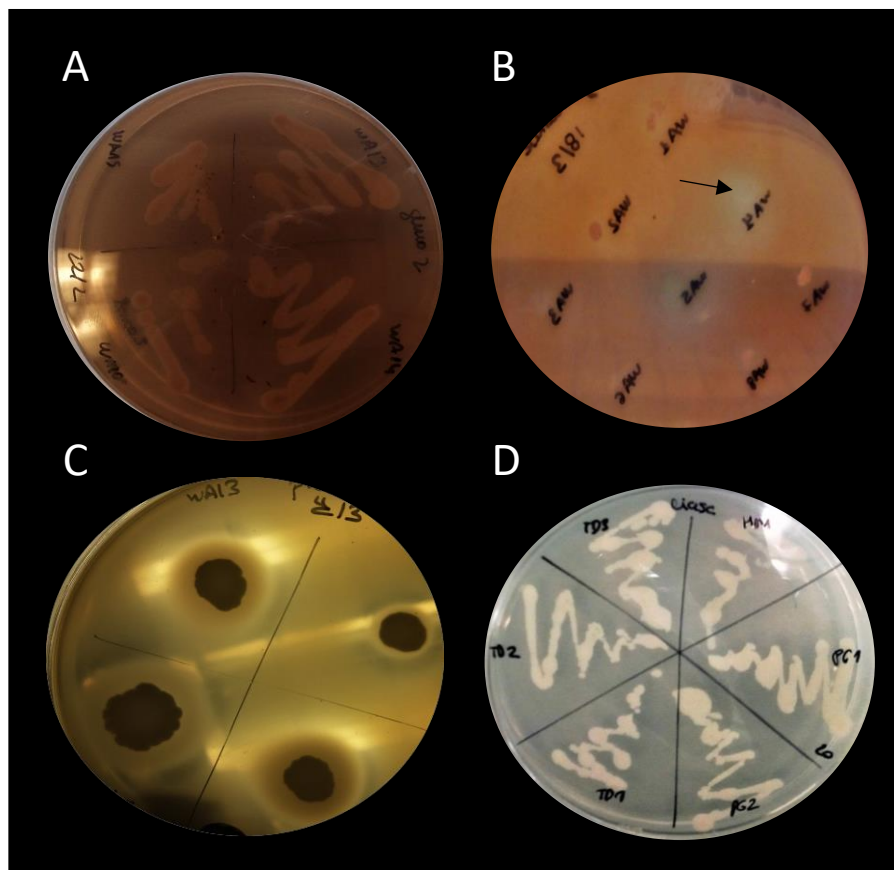

**Figure S1.** Enzymatic activities plates. Dark-black cultures were considered positive  $\beta$ -glucosidase activity (A), positive  $\beta$ -glucanase activity showed a clear halo on the surface after removing the colonies (B), a clear halo around the colonies reported a positive protease activity (C) and  $\beta$ -lyase activity was considered positive when the growth of the isolates was significant (D).
