# Supplementary material for: Non-Saccharomyces Yeasts from Organic Vineyards as Spontaneous Fermentation Agents
Source: MDPI journal article supplement (doi:10.3390/foods12193644), 2023-10-02
Supplement: s1 [file s1]

**Table S1.** Number of non-*Saccharomyces* isolates analysed in this work, depending on the vineyard, vintage and fermentation stage.

| Fermentation stages | Vineyard 1              |                         | Vineyard 2              |                         | Vineyard 3              |                         | Total     |
|---------------------|-------------------------|-------------------------|-------------------------|-------------------------|-------------------------|-------------------------|-----------|
|                     | 1 <sup>st</sup> vintage | 2 <sup>nd</sup> vintage | 1 <sup>st</sup> vintage | 2 <sup>nd</sup> vintage | 1 <sup>st</sup> vintage | 2 <sup>nd</sup> vintage |           |
| CM                  | 4                       | 0                       | 4                       | 8                       | 12                      | 9                       | 37        |
| RM                  | 0                       | 0                       | 0                       | 2                       | 4                       | 6                       | 12        |
| SF                  | 1                       | 0                       | 0                       | 0                       | 0                       | 0                       | 1         |
| TF                  | 0                       | 0                       | 0                       | 0                       | 1                       | 0                       | 1         |
| EF                  | 1                       | 0                       | 0                       | 2                       | 1                       | 0                       | 4         |
| Total               | 6                       | 0                       | 4                       | 12                      | 18                      | 15                      | <b>55</b> |

Fermentation stages: freshly crushed grape must, CM; racked must, RM; start of fermentation, SF; tumultuous fermentation, TF; end of fermentation, EF.
